# Supplementary material for: Simultaneous Analysis of Hydroquinone, Arbutin, and Ascorbyl Glucoside Using a Nanocomposite of Ag@AgCl Nanoparticles, Ag2S Nanoparticles, Multiwall Carbon Nanotubes, and Chitosan
Source: Nanomaterials (Basel). 2020 Aug 12;10(8):1583. doi: 10.3390/nano10081583 (PMC7466507; doi:10.3390/nano10081583)
Supplement: Supplementary file 1 [file nanomaterials-10-01583-s001.pdf]

Article

# Simultaneous Analysis of Hydroquinone, Arbutin, and Ascorbyl Glucoside Using a Nanocomposite of Ag@AgCl Nanoparticles, Ag<sub>2</sub>S Nanoparticles, Multiwall Carbon Nanotubes, and Chitosan

Nutthaya Butwong <sup>1,\*</sup>, Thidarat Kunawong <sup>1</sup> and John H.T. Luong <sup>2</sup>

<sup>1</sup> Applied Chemistry Department, Faculty of Sciences and Liberal Arts, Rajamangala University of Technology Isan, 744, Suranarai Rd., Nakhon Ratchasima 30000, Thailand; thidarat.ku@gmail.com

<sup>2</sup> School of Chemistry, University College Cork, Cork, T12 YN60, Ireland; luongprof@gmail.com

\* Correspondence: nbutwong@gmail.com

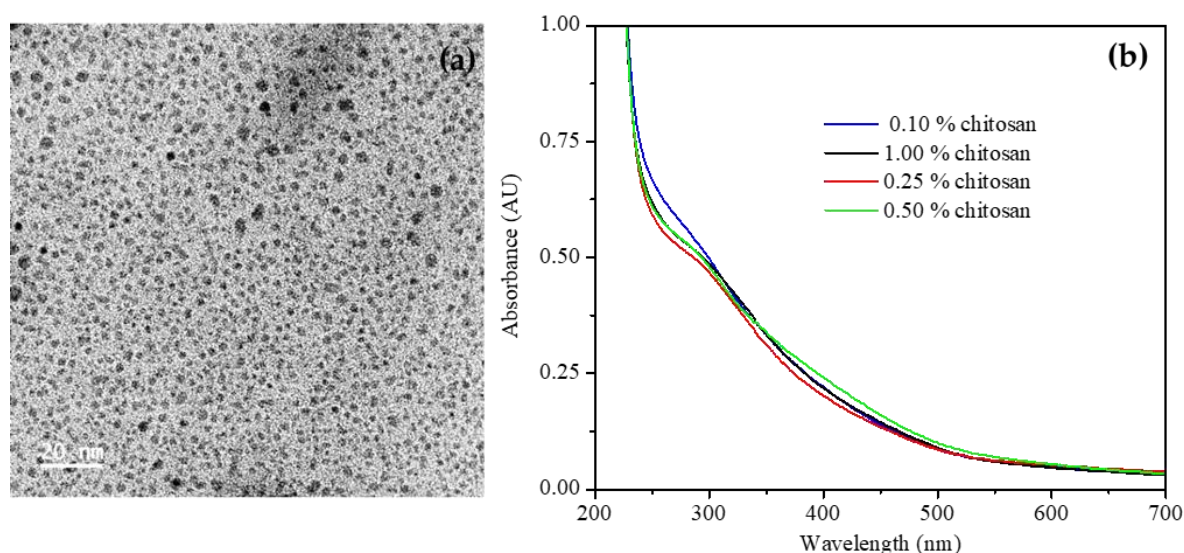

**Figure S1.** (a) A representative TEM micrograph of the synthesized Ag<sub>2</sub>S nanoparticles (diluted 20 times by deionized water) and (b) UV-vis absorption spectra of Ag<sub>2</sub>S using different concentrations of chitosan for the synthesis.

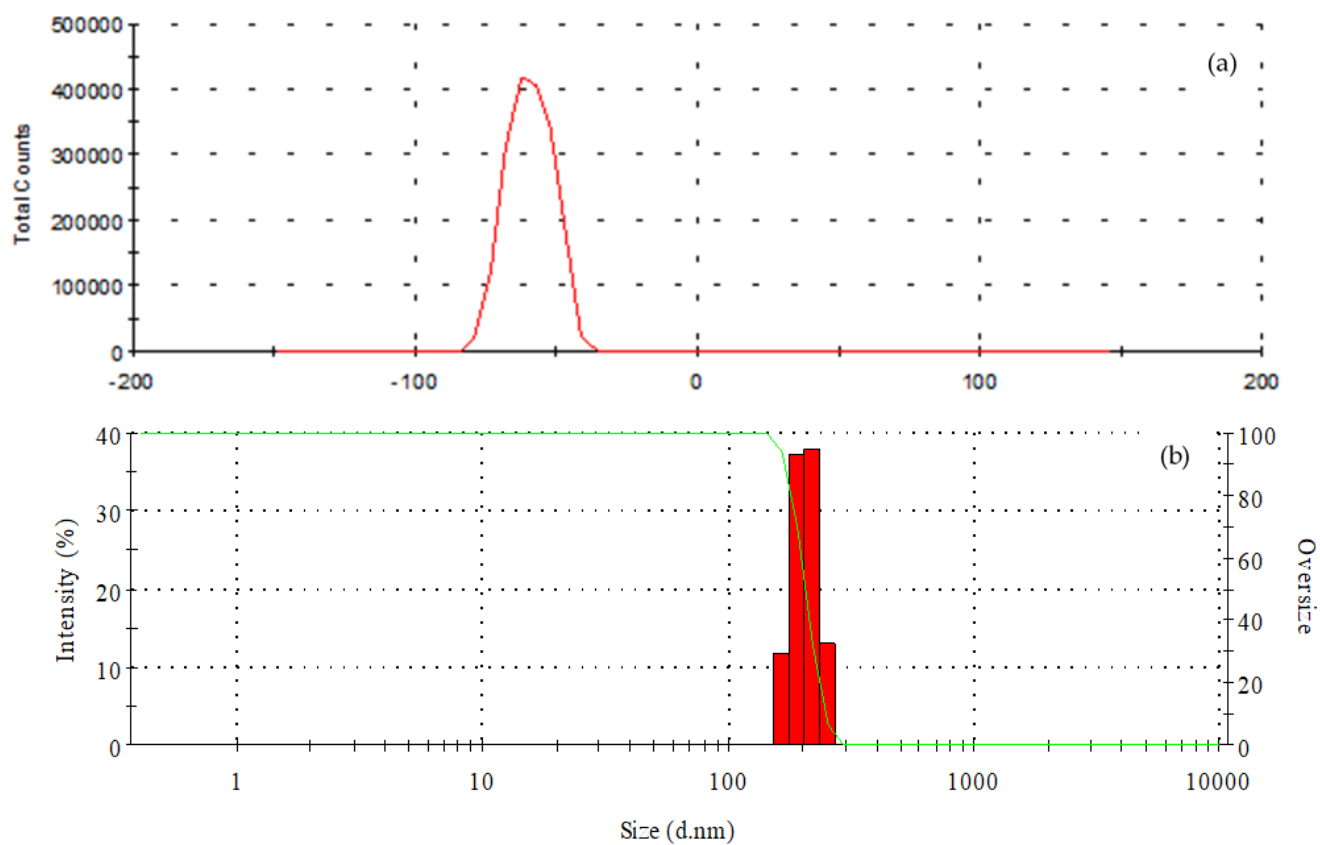

**Figure S2.** The zeta potential of  $\text{Ag}_2\text{S}$  nanoparticles stabilized by chitosan (a) and their relative size distribution (b).

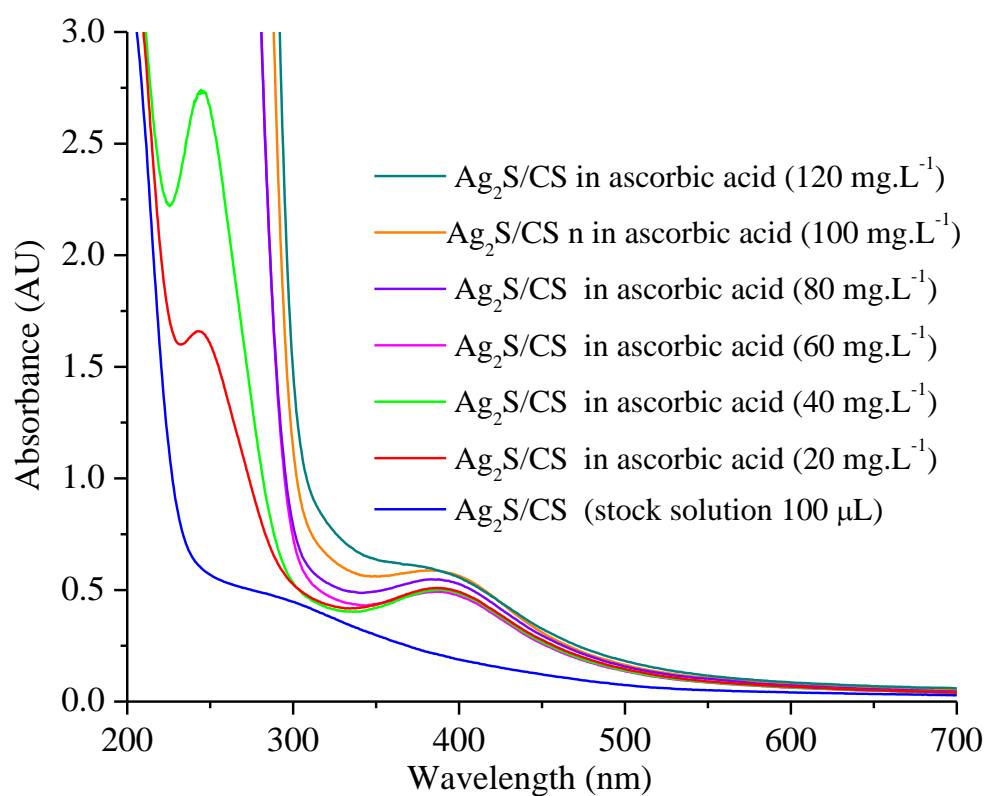

**Figure S3.** The absorption spectra of  $\text{Ag}_2\text{S}$  (10 times dilution by DI water) in the presence of ascorbic acid at different concentrations.

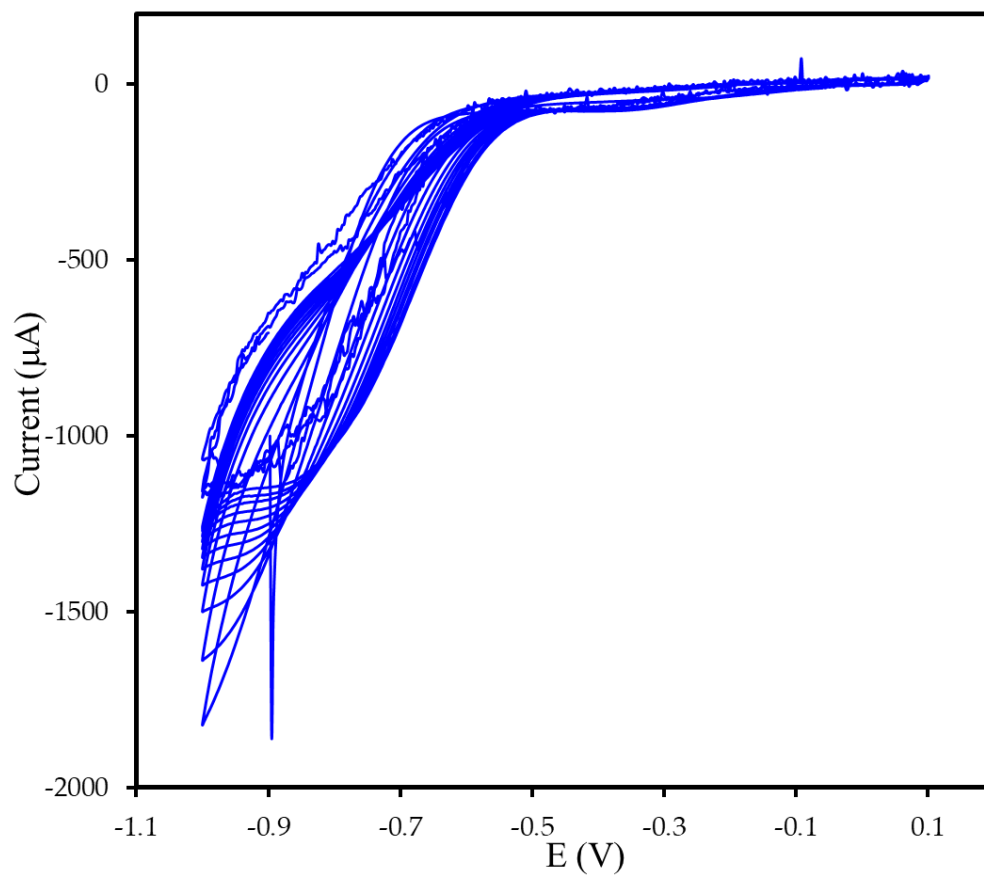

**Figure S4.** Cyclic voltammograms (CVs) with 15 cycles of the CNTs/GCE in the colloidal  $\text{Ag}_2\text{S}$ -chitosan mixture at a scan rate of  $20 \text{ mV.s}^{-1}$ .

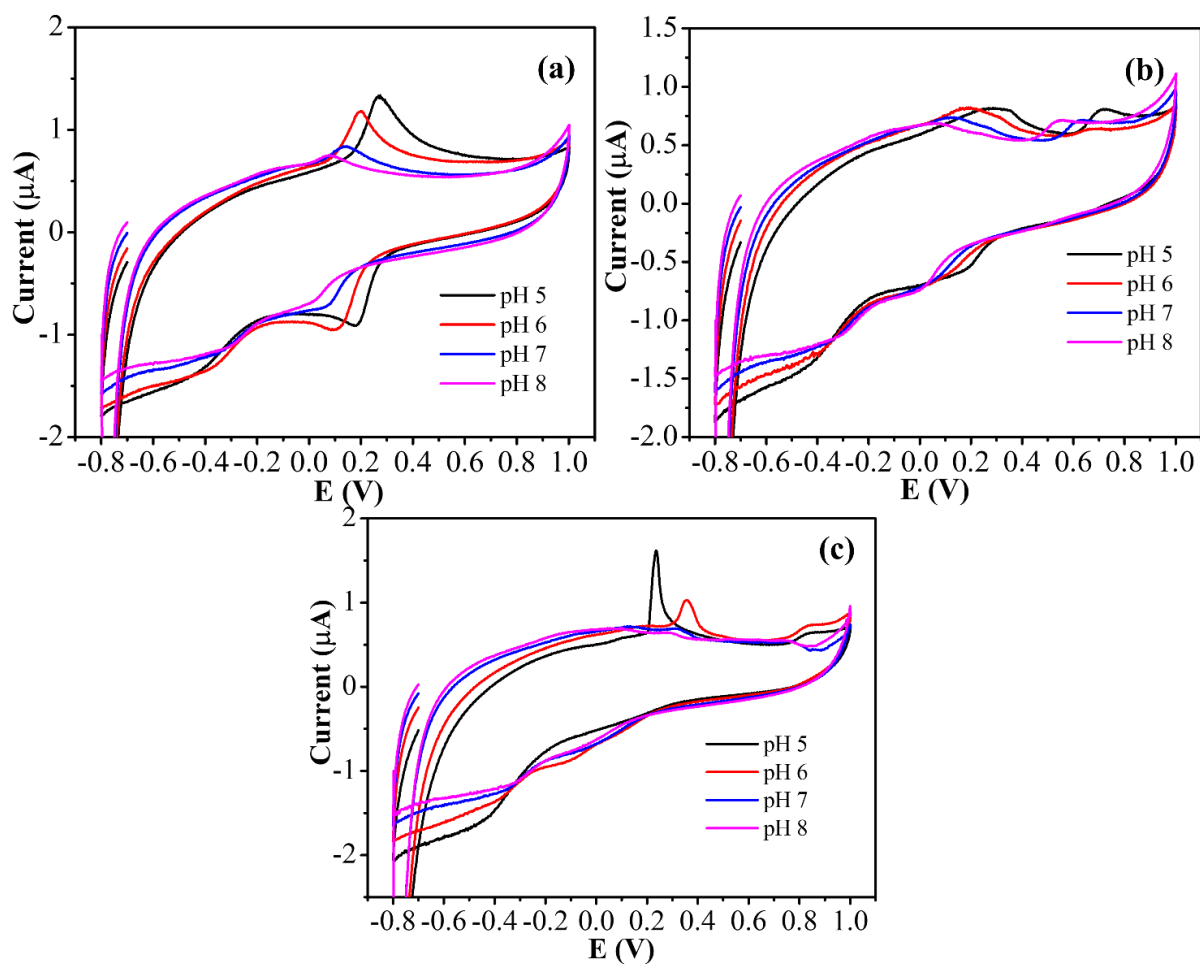

**Figure S5.** The CVs of HQ 7.1  $\mu\text{M}$  (a) AR 4.0  $\mu\text{M}$  (b) and AA2G 3.1  $\mu\text{M}$  (c) in 0.1 M phosphate buffer at different pHs (5.0–8.0).

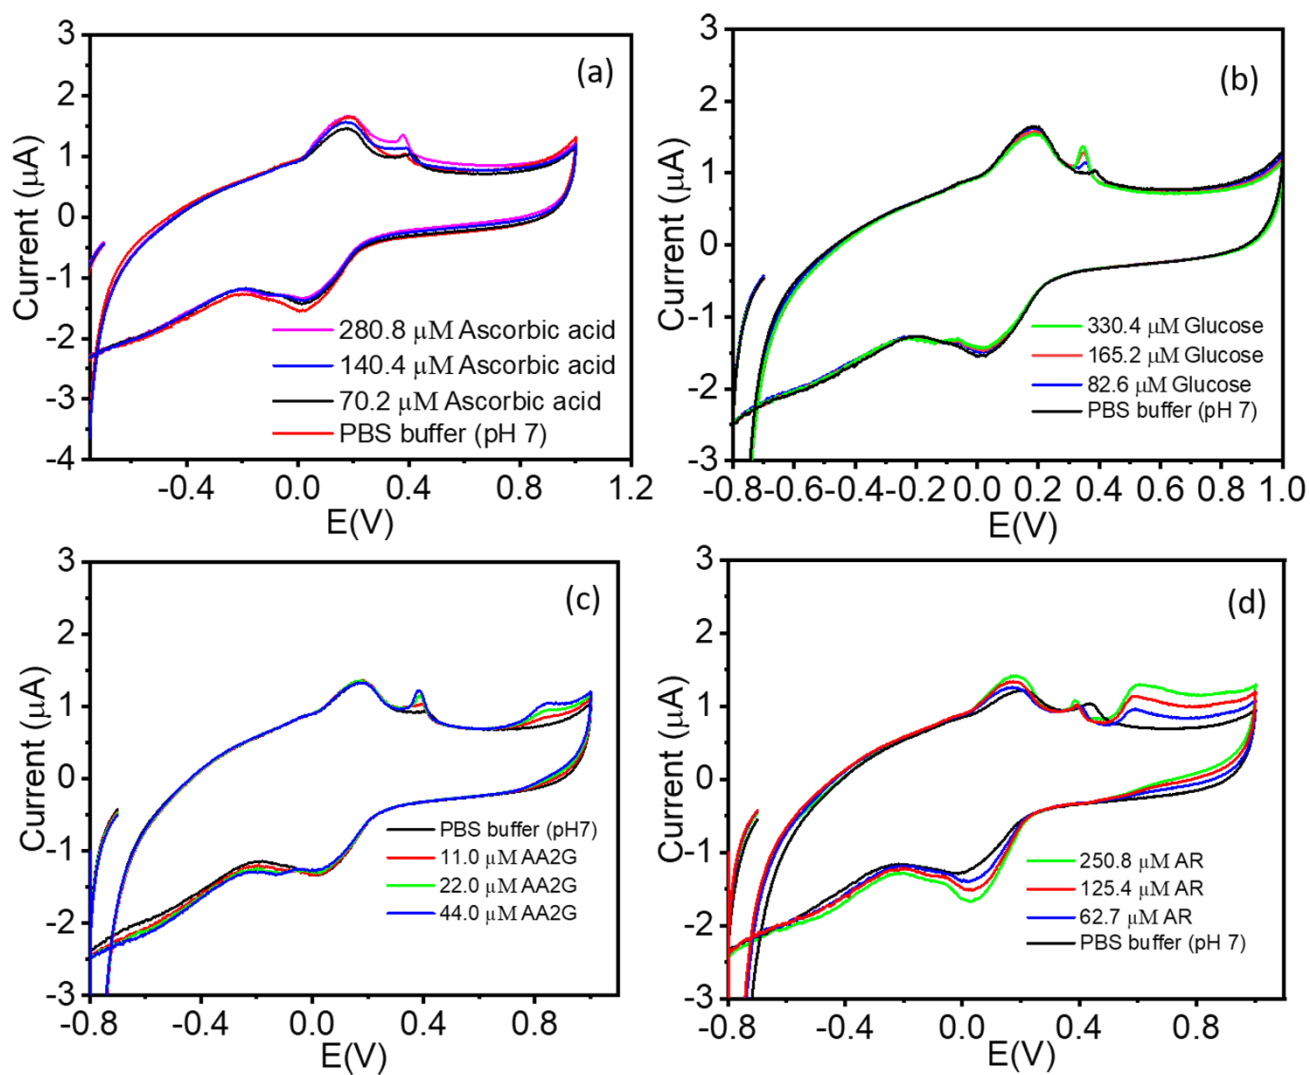

**Figure S6.** The CVs of ascorbic acid (a) glucose (b) AA2G (c) and AR (d) at different concentrations on the Ag@AgCl/Ag<sub>2</sub>S/CNTs/GCE in 0.1 M phosphate buffer, pH 7.

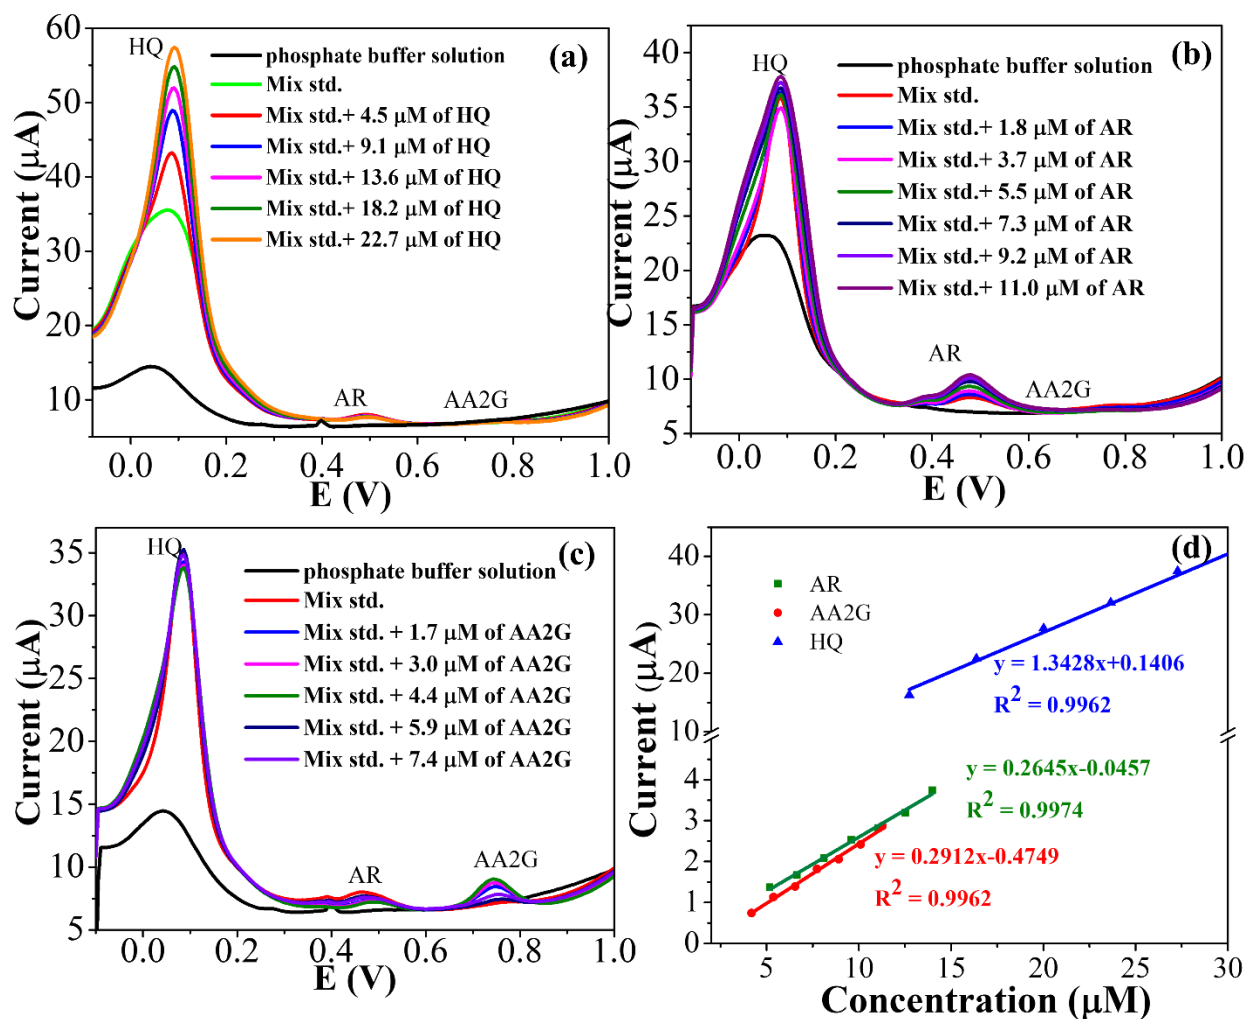

**Figure S7.** DPVs of the Ag@AgCl/Ag<sub>2</sub>S/CNTs/GCE, (a) with different HQ concentrations, while AR = 3.7 μM and AA2G = 3.0 μM, (b) DPVs with different AR concentrations, while HQ = 9.1 μM and AA2G = 3.0 μM (c) DPVs with different AA2G concentrations while HQ = 9.1 μM and AR = 3.7 μM (d) Calibration plot of anodic current (μA) vs. concentration for each analyte (μM).

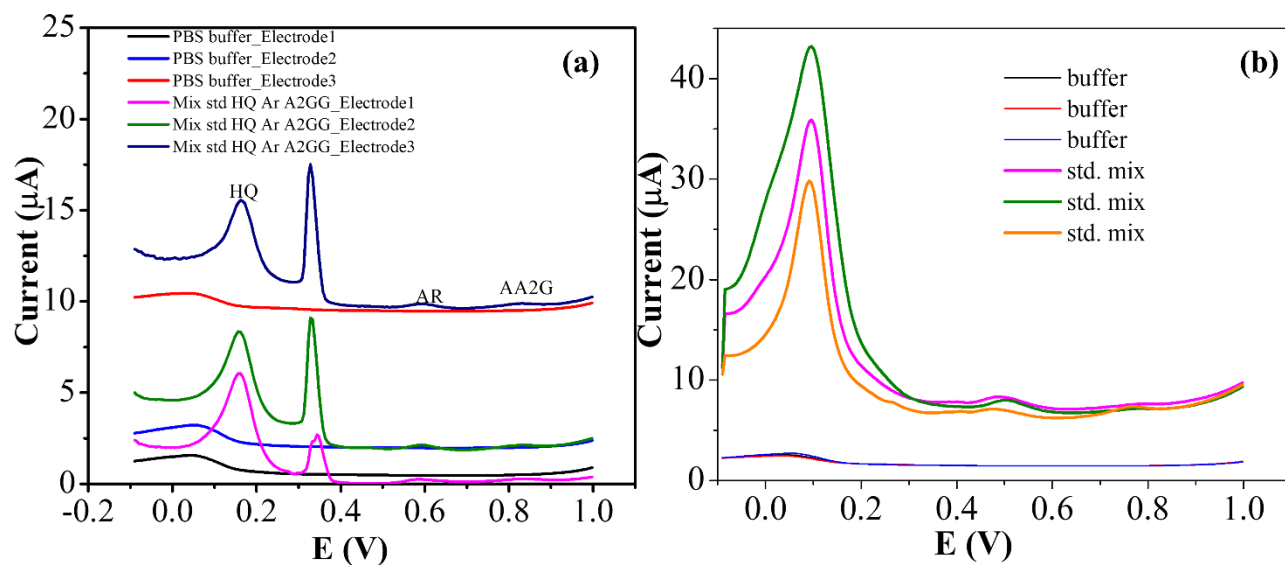

**Figure S8.** The DPV response obtained from the reproducibility of the Ag@AgCl/Ag<sub>2</sub>S/CNTs/GCE (a) and the repeatability (b) studies of using the Ag@AgCl/Ag<sub>2</sub>S/CNTs/GCE for the determination HQ (9.1  $\mu\text{M}$ ), AR (3.7  $\mu\text{M}$ ) and AA2G (3.0  $\mu\text{M}$ ).

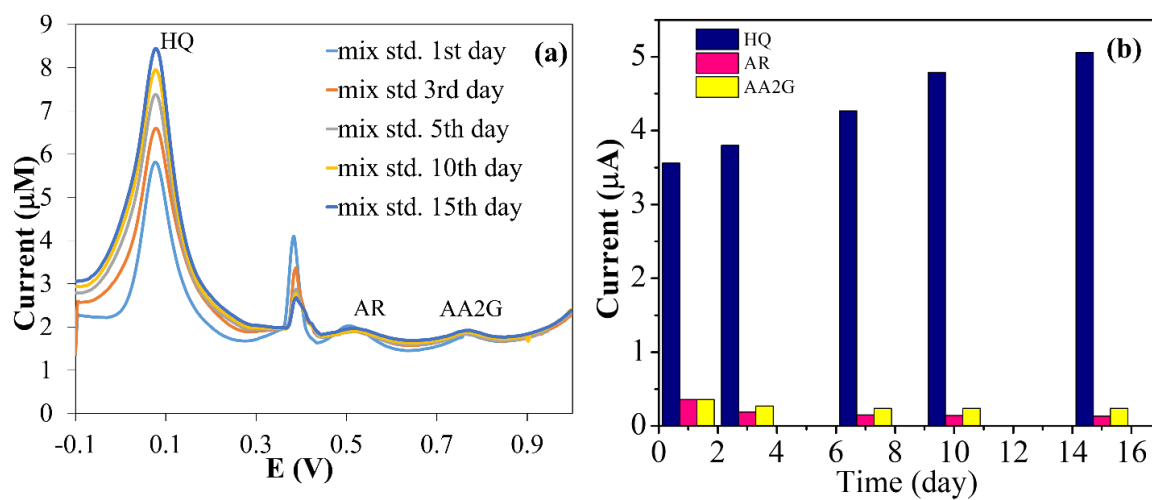

**Figure S9.** The CVs responses of using the same Ag@AgCl/Ag<sub>2</sub>S/CNTs/GCE for determination of the analytes (40 ppb each) in a different day (a) and the anodic current of the analytes obtained by CVs in Figure S9a (b).

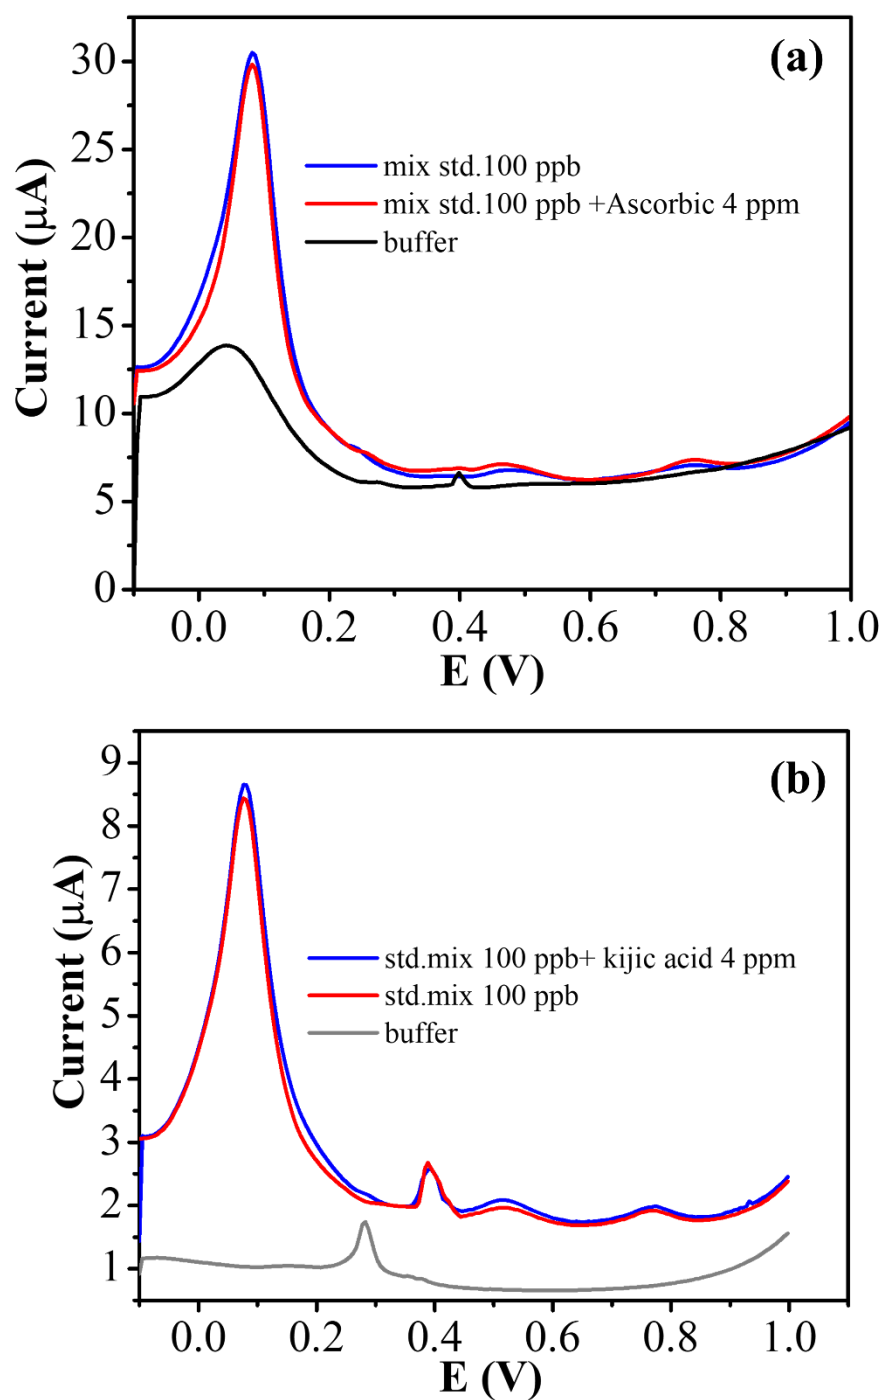

**Figure S10.** The effect of ascorbic acid (a) and kojic acid (b) on the response signal of the simultaneous determination HQ, AR, and AA2G using the Ag@AgCl/Ag<sub>2</sub>S/CNTs/GCE.

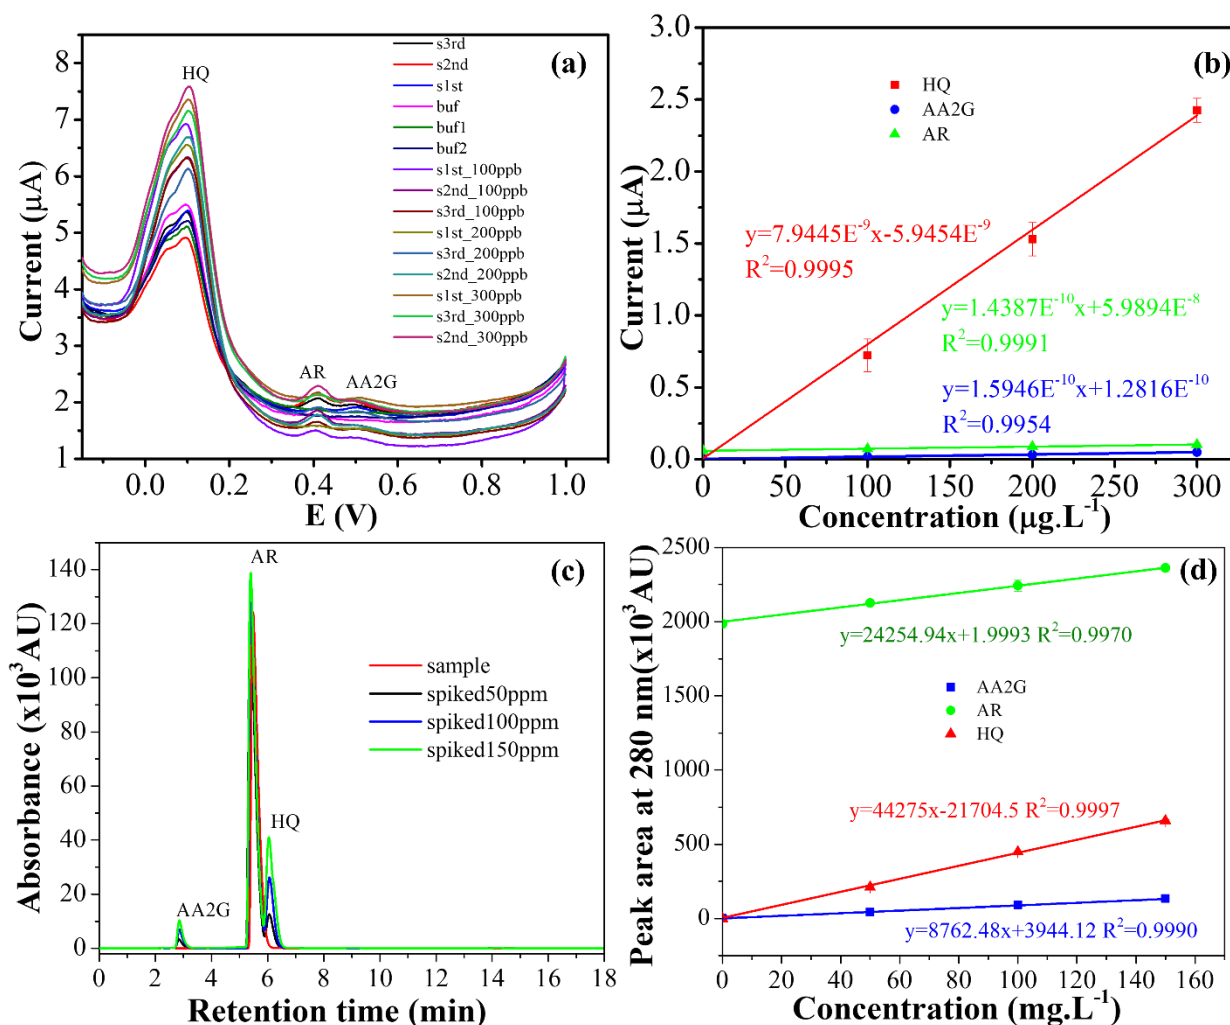

**Figure S11.** DPV responses of the Ag@AgCl/Ag<sub>2</sub>S/CNTs/GCE when a mixture of HQ, AR, and AA2G (100, 200 and 300 μg·L<sup>-1</sup>) was spiked in the whitening lotion (a) and the standard additions calibration curves (b) and chromatograms of the separation the spiked analytes sample (0, 100 and 150 mg·L<sup>-1</sup>) on a C18 column (c) and standard addition calibration curves for HQ, AR, and AA2G (d) HPLC-PDA condition was XBridge C<sub>18</sub> 3.5 μm, 4.6 × 100 mm HPLC column using a mobile phase consisting of the MeOH:50 mM phosphate buffer (pH 2.5) at a ratio of 4:96 with a flow rate 0.5 mL·min<sup>-1</sup>. All analyte absorbances were detected at 280 nm with an injection volume of 20 μL.

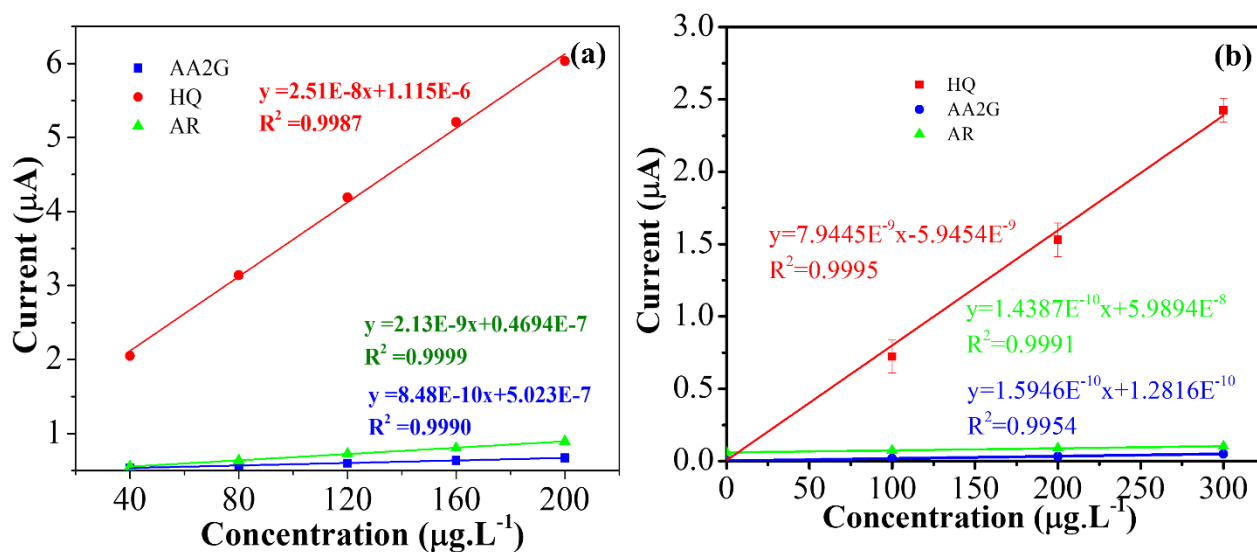

**Figure S12.** Calibration plots of the lotion-spiked standard analytes (a) and the calibration curves of the standard analytes (b).

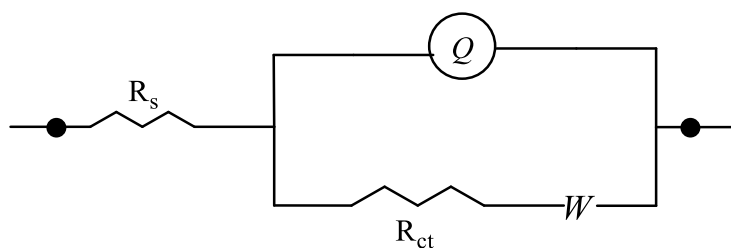

**Figure S13.** The modified Randles circuit is expressed as  $R_s(Q(R_{ct}W))$ :  $R_s(\Omega)$  = resistance of the liquid electrolyte, CPE (constant phase element of pseudo-capacitance) =  $Q^n$  (Farad),  $n = 1$ , true capacitance,  $n = 0$ : pure resistance,  $W$  = Warburg element:  $Z_w = A_w/(j\omega)^{0.5}$ , where  $A_w$  is Warburg coefficient ( $\Omega.s^{-0.5}$ ). The double layer capacitance ( $C_{dl}$ ) is replaced by CPE.

The experimental data were fitted using ZSimpWin software to estimate the model parameters of the modified Randles circuit (Table S1).

**Table S1.** EIS parameters of the modified glassy carbon electrode in 0.1 M KCl containing 5 mM of  $Fe(CN)_6^{4-/3-}$ .

|                        | GCE                   | CNTs                   | Ag <sub>2</sub> S-CNTs | Ag@AgCl/Ag <sub>2</sub> S-CNTs |
|------------------------|-----------------------|------------------------|------------------------|--------------------------------|
| $R_s$ ( $\Omega$ )     | 97.7                  | 75.1                   | 94                     | 70                             |
| CPE ( $Q$ )            | $2.43 \times 10^{-6}$ | $7.44 \times 10^{-4}$  | $3.16 \times 10^{-6}$  | $6.06 \times 10^{-6}$          |
| $n$                    | 0.78                  | 0.21                   | 0.75                   | 0.74                           |
| $R_{ct}$ ( $\Omega$ )  | 386.8                 | 29.3                   | 87.2                   | 46.4                           |
| $A_w(\Omega.s^{-0.5})$ | 0.00225               | 0.00227                | 0.0022                 | 0.0027                         |
| Chi square             | $1.38 \times 10^{-3}$ | $1.047 \times 10^{-3}$ | $6.7 \times 10^{-4}$   | $4.59 \times 10^{-4}$          |

**Table S2.** The matrix effect of the lotion sample on the determination HQ, AR, and AA2G.

|                                    | The slope of the standard addition calibration curve (matrix) | The slope of the calibration curve (solvent) | %ME    |
|------------------------------------|---------------------------------------------------------------|----------------------------------------------|--------|
| The proposed method (DPV)          |                                                               |                                              |        |
| HQ                                 | $7.94 \times 10^{-9}$                                         | $2.51 \times 10^{-8}$                        | 31.65  |
| AR                                 | $1.44 \times 10^{-10}$                                        | $2.13 \times 10^{-9}$                        | 6.75   |
| AA2<br>G                           | $1.5946 \times 10^{-10}$                                      | $8.48 \times 10^{-10}$                       | 18.75  |
| HPLC-PDA method (detect at 280 nm) |                                                               |                                              |        |
| HQ                                 | $4.43 \times 10^4$                                            | $1.71 \times 10^4$                           | 259.34 |
| AR                                 | $2.06 \times 10^4$                                            | $4.33 \times 10^4$                           | 47.51  |
| AA2<br>G                           | $9.05 \times 10^3$                                            | $9.30 \times 10^3$                           | 97.32  |

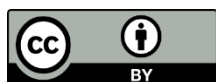

© 2020 by the authors. Licensee MDPI, Basel, Switzerland. This article is an open access article distributed under the terms and conditions of the Creative Commons Attribution (CC BY) license (<http://creativecommons.org/licenses/by/4.0/>).
